# Supplementary material
Source: ML conference proceedings conference paper supplement (https://proceedings.neurips.cc/paper_files/paper/2019/hash/227f6afd3b7f89b96c4bb91f95d50f6d-Abstract.html)
Supplement: Supplementary file [file 227f6afd3b7f89b96c4bb91f95d50f6d-Supplemental.zip]

---

# ANODEV2: A Coupled Neural ODE Framework

---

Anonymous (Full Paper with Appendix)

Affiliation

Address

email

## Abstract

1 It has been observed that residual networks can be viewed as the explicit Euler dis-  
2 cretization of an Ordinary Differential Equation (ODE). This observation motivated  
3 the introduction of so-called Neural ODEs, which allow more general discretization  
4 schemes with adaptive time stepping. Here, we propose ANODEV2, which is an  
5 extension of this approach that allows evolution of the neural network parameters,  
6 in a coupled ODE-based formulation. The Neural ODE method introduced earlier  
7 is in fact a special case of this new framework. We present the formulation of  
8 ANODEV2, derive optimality conditions, and implement the coupled framework  
9 in PyTorch. We present empirical results using several different configurations of  
10 ANODEV2, testing them on multiple models on CIFAR-10. We report results  
11 showing that this coupled ODE-based framework is indeed trainable, and that  
12 it achieves higher accuracy, as compared to the baseline models as well as the  
13 recently-proposed Neural ODE approach.

## 14 1 Introduction

15 Residual networks [1, 2] have enabled training of very deep neural networks (DNNs). Recent work  
16 has shown an interesting connection between residual blocks and ODEs, showing that a residual  
17 network can be viewed as a discretization to a continuous ODE operator [3, 4, 5, 6, 7, 8]. These  
18 formulations are commonly called *Neural ODEs* and here we follow the same convention. Neural  
19 ODEs provide a general framework that connects discrete DNNs to continuous dynamical systems  
20 theory as well as discretization and optimal control of ODEs, all subjects with very rich theory.  
21 A basic Neural ODE formulation and its connection to residual networks (for a single block in a  
22 network) is the following:

$$z_1 = z_0 + f(z_0, \theta) \quad \text{ResNet,} \quad (1a)$$

$$z(1) = z(0) + \int_0^1 f(z(t), \theta) dt \quad \text{ODE,} \quad (1b)$$

$$z(1) = z(0) + f(z_0, \theta) \quad \text{ODE forward Euler.} \quad (1c)$$

23 Here,  $z_0$  is the input to the network and  $z_1$  is the output activation;  $\theta$  is the vector of network weights  
24 (independent of time); and  $f(z, \theta)$  is the nonlinear operator defined by this block. (Here we have  
25 written the ODE  $dz/dt = f(z, \theta)$  in terms of its solution at  $t = 1$ .) We can see that a single-step of  
26 forward Euler discretization of the ODE is identical to a traditional residual block. Alternatively, we  
27 could use a different time-stepping scheme or, more interestingly, use more time steps. Once the  
28 connection to ODEs was identified, several groups have incorporated the Neural ODE structure in  
29 neural networks and evaluated their performance on several different learning tasks.

30 A major challenge with training Neural ODEs is that backpropogating through ODE layers requires  
31 storage of all the intermediate activations (i.e.,  $z$ ) in time. In principle, the memory footprint of  
32 ODE layers has a cost of  $\mathcal{O}(N_t)$  ( $N_t$  is the number of time steps to solve the ODE layer), which is  
33 prohibitive. The recent work of [8] proposed an adjoint based method, with a training strategy that  
34 required only storage of the activation at the end of the ODE layer. All the intermediate activations

were then “re-computed” by solving the ODE layers backwards. However, it has been recently shown that such an approach could lead to incorrect gradients, due both to numerical instability and also to inconsistencies that relate to optimizing infinite dimensional operators (the so called Discretize-Then-Optimize vs. Optimize-Then-Discretize issue) [9]. Moreover importantly, it was observed that using other discretization schemes such as RK2 or RK4, or using more time steps does not affect the generalization performance of the model (even with DTO approach). In this paper, building on the latter approach of [9], we propose ANODEV2 a more general Neural ODE framework that addresses this problem. ANODEV2 allows the evolution of *both weights and activations* by a coupled system of ODEs:

$$\begin{cases} z(1) = z(0) + \int_0^1 f(z(t), \theta(t)) dt & \text{“parent network”,} \\ \theta(t) = \theta(0) + \int_0^t q(\theta(t), p) dt, \quad \theta(0) = \theta_0 & \text{“weight network”.} \end{cases} \quad (2)$$

Here,  $q(\cdot)$  is a nonlinear operator (essentially controlling the dynamics of the network parameters in time);  $\theta_0$  and  $p$  are the corresponding parameters for the weight network. Our approach allows  $\theta$  to be time dependent:  $\theta(t)$  is parameterized by the learnable dynamics of  $d\theta/dt = q(\theta(t), p)$ . This, in turn, is parameterized by  $\theta_0$  and  $p$ . In other words, instead of optimizing for a constant  $\theta$ , we optimize for  $\theta_0$  and  $p$ . During inference, *both* weights  $\theta(t)$  and activations  $z(t)$  are forward-propagated in time by solving Eq. 2. Observe that if we set  $q = 0$  then we recover the Neural ODE approach proposed by [8]. Eq. 2 replaces the problem of designing appropriate neural network blocks ( $f$ ) with the problem of choosing appropriate function ( $q$ ) in an ODE to model the changes of parameter  $\theta$  (the weight network).

In summary, our main contributions are the following.

- We provide a general framework that extends Neural ODEs to system of coupled ODEs which, allows coupled evolution of both model parameters and activations. This coupled formulation addresses the challenge with Neural ODEs, in that using more time steps or different discretization schemes do not affect model’s generalization performance [9].
- We derive the optimality conditions for how backpropagation should be performed for the coupled ODE formulation using the so called Karush–Kuhn–Tucker conditions. In particular, we implement the corresponding Discretize-Then-Optimize (DTO) approach, along with a checkpointing scheme presented in [9].
- We test the framework using multiple different residual models on Cifar-10 by considering different coupled formulations. In particular, we show examples illustrating how a biologically motivated reaction-diffusion-advection ODE could be used to model the evolution of the neural network parameters.
- We have open sourced the implementation of the coupled framework in Pytorch which allows general evolution operators (and not just the reaction-diffusion-advection). In fact some of the earlier works such as HyperNetworks are special cases of ANODEV2, and can be implemented in this framework. The code is available in [10].

There is a rich literature on neural evolution research [11, 12, 13, 14, 15, 16, 17]. Several similar approaches to ours have been taken in the line of evolutionary computing, where an auxiliary “child” network is used to generate the parameters for a “parent” network. This approach permits the restriction of the effective depth that the activations must go through, since the parent network could have smaller weight space than the child network. One example is HyperNEAT [18], which uses “Compositional Pattern Producing Networks” (CPRNs) to evolve the model parameters [19, 20]. A similar approach using “Compressed Weight Search” was proposed in [21]. A follow up work extended this approach by utilizing differentiable CPRNs [22]. The authors show that neural network parameters could be encoded through a fully connected architecture. Another seminal work in this direction is [23, 24], where an auxiliary network learns to produce “context-aware” weights in a recurrent NN model. A similar recent approach is taken in Hypernetworks [25]. In this approach, the model parameters are evolved through an auxiliary learnable neural network. This approach is a special case of the above framework, which could be derived by using a single time step discretization of Eq. 2, with a neural network for the evolution operator (denoted by  $q$  and introduced in the next section). Our framework is a generalization of these evolutionary algorithms, and it provides more flexibility for modeling the evolution of the model parameters in time. For instance, we will show how biologically motivated diffusion-reaction-advection operators could be used for the evolution operator  $q$ , with negligible increase in the model parameter size.

## 2 Methodology

In this section, we discuss the formulation for the coupled ODE-based neural network model described above, and we derive the corresponding optimality conditions. For a typical learning problem, the goal is to minimize the empirical risk over a set of training examples. Given a loss function  $\ell_i$ , where  $i$  indexes the training sample, we seek to find weights,  $\theta \in \mathbb{R}^d$ , such that:

$$\min_{\theta} \frac{1}{N} \sum_{i=1}^N \ell_i(z_i(\theta)) + R(\theta), \quad (3)$$

where  $R$  is a regularization operator and  $N$  the number of training samples. The loss function depends implicitly on  $\theta$  through the network activation vector  $z_i$ . This problem is typically solved using Stochastic Gradient Descent (SGD) and backpropagation to compute the gradient of  $z_i$  with respect to  $\theta$ .

### 2.1 Neural ODE

Consider the following notation for a residual block:  $z_1 = z_0 + f(z_0; \theta)$ , where  $z_0$  is the input activation,  $f(\cdot)$  is the NN kernel (e.g., comprising a series of convolutional blocks with non-linear or linear activation functions), and  $z_1$  is the output activation. As discussed above, an alternative view of a residual network is the following continuous-time formulation:  $\frac{dz}{dt} = f(z(t); \theta)$ , with  $z(t=0) = z_0$  and  $z(t=1) = z_1$  (we will use both  $z(t)$  and  $z_t$  to denote activation at time  $t$ ). In the ODE-based formulation, this NN has a continuous depth. In this case, we need to solve the following constrained optimization problem (Neural ODE):

$$\min_{\theta} \frac{1}{N} \sum_{i=1}^N \ell_i(z_i(1)) + R(\theta) \quad \text{subject to:} \quad \frac{dz}{dt} = f(z(t), \theta), \quad z(0) = z_0. \quad (4)$$

Note that in this formulation the neural network parameters are stale in time. In fact it has been observed that using adaptive time stepping or higher order discretization methods such as Runge-Kutta does not result in any gains in generalization performance using the above framework [9]. To address this, we extend the Neural ODEs by considering a system of coupled ODEs, where the model parameters as well as activations evolve in time. In fact, this formulation is slightly more general than what we described in the introduction. For this reason, we introduce an auxiliary dynamical system for  $w(t)$ , which we use to define  $\theta$ . In particular, we propose the following formulation:

$$\min_{p, w_0} \mathcal{J}(z(1)) = \frac{1}{N} \sum_{i=1}^N \ell_i(z_i(1)) + R(w_0, p), \quad (5a)$$

$$\frac{dz}{dt} = f(z(t), \theta(t)), \quad z(0) = z_0 \quad \text{“Activation ODE”}, \quad (5b)$$

$$\frac{\partial w}{\partial t} = q(w; p), \quad w(0) = w_0 \quad \text{“Evolution ODE”}, \quad (5c)$$

$$\theta(t) = \int_0^t K(t - \tau) w(\tau) d\tau. \quad (5d)$$

Note that here  $\theta(t)$  is a function of time, and it is parameterized by the whole dynamics of  $w(t)$  and a time convolution kernel  $K$  (which in the simplest form could be a Dirac delta function such that  $\theta(t) = w(t)$ ). Also,  $q(w, p)$  can be a general function, e.g., another neural network, a linear operator or even a discretized Partial Differential Equation (PDE) based operator. The latter perhaps is useful if we consider the  $\theta(t)$  as a function  $\theta(u, t)$ , where  $u$  parameterizes the signal space (e.g., 2D pixel space for images). This formulation allows for rich variations of  $\theta(t)$ , while using a lower dimensional parameterization: notice that implicitly we have that  $\theta(t) = \theta(w_0, p, t)$ . Also, this formulation permits novel regularization techniques. Instead of regularizing  $\theta(t)$ , we can regularize  $w_0$  and  $p$ .

A crucial question is: how should one perform backpropagation for this formulation? It is instructive to compute the actual derivatives to illustrate the structure of the problem. To derive the optimality conditions for this constrained problem, we need to first form the Lagrangian operator and derive the so called Karush–Kuhn–Tucker (KKT) conditions:

$$\begin{aligned}\mathcal{L} = & \mathcal{J}(z(1)) + \int_0^1 \alpha(t) \cdot \left( \frac{dz}{dt} - f(z(t), \theta(t)) \right) dt + \int_0^1 \beta(t) \cdot \left( \frac{\partial w}{\partial t} - q(w; p) \right) dt \\ & + \int_0^1 \gamma(t) \cdot \left( \theta(t) - \int_0^t K(t-\tau)w(\tau)d\tau \right) dt.\end{aligned}\quad (6)$$

Here,  $\alpha(t)$ ,  $\beta(t)$ , and  $\gamma(t)$  are the corresponding adjoint variables (Lagrange multiplier vector functions) for the constraints in Eq. 5. The solution to the optimization problem of Eq. 5 could be found by computing the stationary points of the Lagrangian (KKT conditions), which are the gradient of  $\mathcal{L}$  with respect to  $z(t)$ ,  $w(t)$ ,  $\theta(t)$ ,  $p$ ,  $w_0$  and the adjoints  $\alpha(t)$ ,  $\beta(t)$ ,  $\gamma(t)$ . The variations of  $\mathcal{L}$  with respect to the three adjoint functions just result in the ODE constraints in Eq. 5. The remaining variations of  $\mathcal{L}$  are the most interesting and are given below (see Appendix D for additional discussion on the derivation):

$$\frac{\partial \mathcal{J}(z(1))}{\partial z_1} + \alpha_1 = 0, \quad -\frac{\partial \alpha}{\partial t} - \left( \frac{\partial f}{\partial z} \right)^T \alpha(t) = 0; \quad (\partial \mathcal{L}_z) \quad (7a)$$

$$-\left( \frac{\partial f}{\partial \theta} \right)^T \alpha(t) + \gamma(t) = 0; \quad (\partial \mathcal{L}_\theta) \quad (7b)$$

$$-\frac{\partial \beta(t)}{\partial t} - \left( \frac{\partial q}{\partial w} \right)^T \beta(t) - (1 - H(t)) \int_0^1 K^T(\tau - t) \gamma(\tau) d\tau = 0, \quad \beta(1) = 0; \quad (\partial \mathcal{L}_w) \quad (7c)$$

$$-\beta(0) + \frac{\partial R}{\partial w_0} = g_{w_0}; \quad (\partial \mathcal{L}_{w_0}) \quad (7d)$$

$$\frac{\partial R}{\partial p} - \int_0^1 \left( \frac{\partial q}{\partial p} \right)^T \beta(t) dt = g_p; \quad (\partial \mathcal{L}_p) \quad (7e)$$

where  $H(t)$  is the scalar Heaviside function. To compute the gradients  $g_p$  and  $g_{w_0}$ , we proceed as follows. Given  $w_0$  and  $p$ , we forward propagate  $w_0$  to compute  $w(t)$  and then  $\theta(t)$ . Then using  $\theta(t)$  we can compute the activations  $z(t)$ . Then we solve the adjoint equations for  $\alpha(t)$ ,  $\gamma(t)$  and  $\beta(t)$ , in this order Eq. 7a-7e. Finally, the gradients of the loss function with respect to  $p$  ( $g_p$ ) and  $w_0$  ( $g_{w_0}$ ) are given from the last two equations. Notice that if we set  $q = 0$  we will derive the optimality conditions for the Neural ODE without any dynamics for the model parameters, which was the model presented in [8]. The benefit of this more general framework is that we can encapsulate time dynamics of the model parameter without increasing the memory footprint of the model. In fact, this approach only requires storing initial condition for the parameters, which is parameterized by  $w_0$ , along with the parameters of the control operator  $q$  which are denoted by  $p$ . As we show in the results section, the latter can have negligible memory footprint, but yet allow rich representation of model parameter dynamics.

**PDE-inspired formulation.** There are several different models for the  $q(w, p)$ , the evolution function for the weight convolutional network. One possibility is to use a convolutional block (resembling a recurrent network). However, this can increase the number of parameters significantly. Inspired by Turing’s reaction-diffusion partial differential equation models for pattern formation, we view a convolutional filter as a time-varying pattern (where time here represents the depth of the network) [12]. To illustrate this, we consider a PDE based model for the control operator  $q$ , as follows:

$$\frac{dw}{dt} = \sigma(\tau \Delta w + v \cdot \nabla w + \rho w), \quad (8)$$

where  $\tau$  is used to control the diffusion ( $\Delta w$ ),  $v$  is used to control the advection ( $\nabla w$ ),  $\rho$  is used to control the reaction ( $w$ ), and  $\sigma$  is a nonlinear activation (such as sigmoid or tanh). View the weights  $w$  as a time series signal, starting from the initial signal,  $w(0)$ , and evolving in time to produce  $w(1)$ . In fact one can show that the above formulation can evolve the parameters to any weights, if there exists a diffeomorphic transformation of between the two distributions (i.e. if there exists a velocity field  $v$  such  $w(1)$  is the solution of Eq. 8, with initial condition  $w(0)$  [26]). Although this operator is mainly used as an example control block (i.e., ANODEV2 is not limited to this model), but diffusion-reaction-advection operator can capture interesting dynamics for model parameters. For instance, consider a single Gaussian operator for a convolutional kernel, which is centered in the

middle with a unit variance. A diffusion operator can simulate multiple different normal distributions with different variance in time. Note that this requires storing only a single diffusion parameter (i.e.,  $\tau$ ). Another interesting operator is the advection operator which models species transport. For the Gaussian case, this operator could for instance transport the center of the Gaussian to different positions other than the center of the convolution. Finally, the reaction operator, could allow growth or decay of the intensity of the convolution filters. The full diffusion-reaction-advection operator could encapsulate more complex dynamics of the NN parameters in time. An synthetic example is shown in Figure 3 in the appendix, and a real example ( $5 \times 5$  convolutional kernel of AlexNet) is shown in Figure 1.

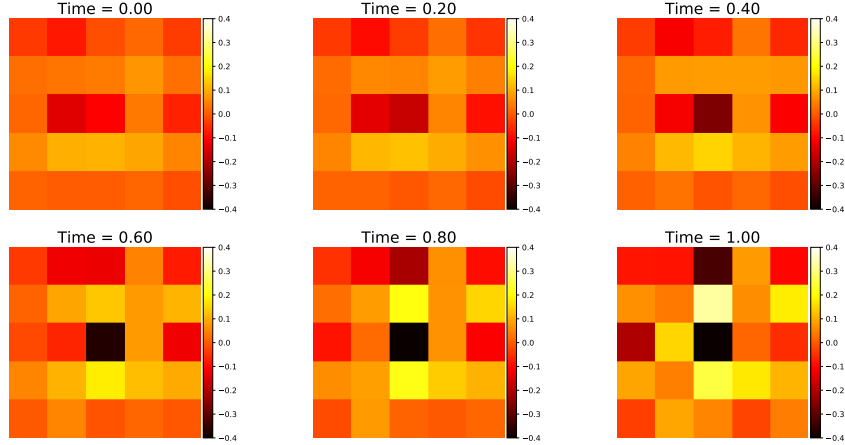

**Figure 1:** Illustration of how different convolutional operators are evolved in time during the coupled neural ODE solve (through the evolution operator  $q$ ). The figure corresponds to the first channel of the first convolution kernel parameters of AlexNet. These filters will be applied to activation in different time steps (through the  $f$  operator in the coupled formulation). As the time step increases, the kernel turns out to focus on some specific part on the activation map. Similar illustrations for ResNet-4 and ResNet-10 are shown in Figure 4 and 5 in the appendix.

## 2.2 Two methods used in this paper

We use two different coupling configurations of ANODEV2 as described below.

**Configuration One.** We use multiple time steps to solve for both  $z$  and  $\theta$  in the network instead of just one time step as in the original ResNet. Then the discretized solution of Eq. 10 in appendix will be as follows:

$$z_{t_0+\delta t} = z_{t_0} + \delta t f(z_{t_0}; \theta_{t_0}); \quad \theta_{t_0+\delta t} = \sigma \left( F^{-1} \left( \exp((- \tau k^2 + i k v + \rho) \delta t) F(\theta_{t_0}) \right) \right). \quad (9)$$

where  $\delta t$  is the discretization time scale, and  $F$  is Fast Fourier Transform (FFT) operator (for derivation please see appendix). In this setting, we will alternatively update the value of  $z$  and  $\theta$  according to Eq. 9. Hence, the computational cost for an ODE block will be roughly  $N_t$  times more expensive compared to that for the original residual block (same as in [8]). This network can be viewed as applying  $N_t$  different residual blocks in the network but with Neural Network weights that evolve in time. Note that this configuration does not increase the parameter size of the original network except slight overhead of  $\tau$ ,  $v$  and  $\rho$ .

The first configuration is shown in top of Figure 2, where the model parameters and activations are solved with the same discretization. This is similar to the Neural ODE framework of [8], except that the model parameters are evolved in time for subsequent times, whereas in [8] the same model parameters are applied to the activations. The dynamics of the model parameters are illustrated by different colors used for the convolution kernels in top of Figure 2. This configuration is equivalent to using the Dirac delta function for the  $K$  function in Eq. 5d.

**Configurations Two.** ANODEV2 supports different coupling configurations between the dynamics of activations and model parameters. For example, it is possible to not restrict the dynamics of  $\theta$  and  $z$  to align in time, which is the second configuration that we consider. Here, we allow model parameters to evolve and only apply to activations after a fixed number of time steps. For instance, consider the Gaussian example illustrated in Figure 3. In the first configuration, a residual block

191 is created for each of the three time steps. However, in configuration two, we only apply the first  
 192 and last time evolutions of the parameters (i.e. we only use  $w_0$  and  $w_1$  to apply to activations). This  
 193 configuration allows sufficient time for the model parameters to evolve, and importantly limits the  
 194 depth of the network that activations go through (see the bottom of Figure 2). In this case, the depth  
 195 of the network is increased by a factor of two, instead of  $N_t$  as in the first configuration (which  
 196 is the approach used in [8, 9]). Both configurations are supported in ANODEV2 and we present  
 197 preliminary results for both settings.

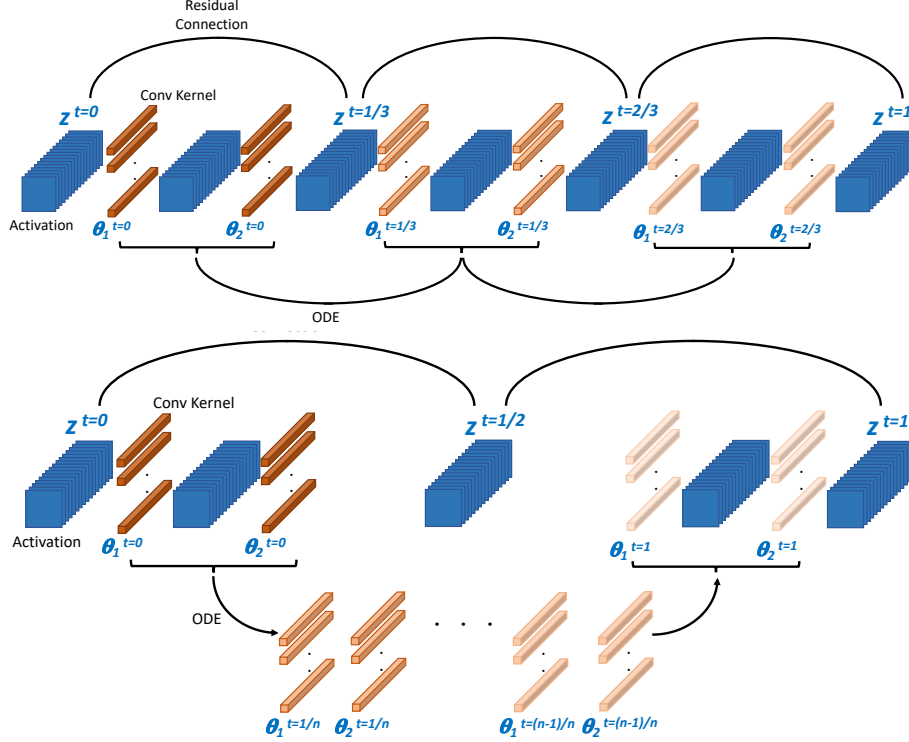

**Figure 2:** Illustration of different configurations in ANODEV2. The top figure shows configuration 1, where both the activation and weights  $\theta$  are evolved through a coupled system of ODEs. During inference, we solve both of these ODEs forward in time. Blue squares in the figure represent activation with multiple channels; the orange bars represent the convolution kernel. The convolution weights  $\theta$  are computed by solving an auxiliary ODE. The bottom figure shows configuration 2, where first the weights are evolved in time before applying them to the activations.

## 198 3 Results

199 In this section, we report the results of ANODEV2 for the two configurations discussed in section 2,  
 200 on CIFAR-10 dataset which consists of 60,000  $32 \times 32$  colour images in 10 classes. The framework is  
 201 developed as a library in Pytorch and uses the checkpointing method proposed in [9], along with the  
 202 discretize-then-optimize formulation of the optimality conditions shown in Eq. 7.

203 We test ANODEV2 on AlexNet with residual connection, as well as two different ResNets. Please  
 204 see Appendix B and Appendix A.1 for the details of model architectures and training settings.  
 205 We consider the two coupling configurations between the evolution of the activations and model  
 206 parameters as discussed next.

### 207 3.1 Configuration One

208 We first start with the configuration one, which is the same as the setting used in [8, 9]. The model  
 209 parameters and activations are evolved in time and for each time step when a new residual block is  
 210 applied to the input activation, as shown in Figure 2 (top). The results shown in Table 1. All the  
 211 experiments were repeated five times, and we report both the min/max accuracy as well as the average  
 212 of these five runs.



Note that the coupled ODE based approach outperforms the baseline in all of the three statistical properties above (i.e. min/max/average accuracy). For example, on ResNet-10 the coupled ODE network achieves 89.04% average test accuracy as compared to 88.10% of baseline, which is 0.94% better. Meanwhile, a noticeable observation is that the minimum performance of the coupled ODE based network is comparable or even better than the maximum performance of baseline. The coupled ODE based AlexNet has 88.59% minimum accuracy which is 1.44% higher than the best performance of baseline out of five runs. Hence, the generalization performances of the coupled ODE based network are consistently better than those of the baseline. It is important to note that the model parameter size of the coupled ODE approach in ANODEV2 is the same as that of the baseline. This is because the size of the control parameters  $p$  is negligible. A comparison discussion is shown in section 4.1.

**Table 1:** Results for using  $Nt = 5$  time steps to solve  $z$  and  $\theta$  in neural network with configuration 1. We tested on AlexNet, ResNet-4, and ResNet-10. We get 1.75%, 1.16% and 0.94% improvement over the baseline respectively. Note that the model size of the ANODEV2 and baseline is comparable.

|          | AlexNet                |               | ResNet-4               |               | ResNet-10              |               |
|----------|------------------------|---------------|------------------------|---------------|------------------------|---------------|
|          | Min / Max              | Avg           | Min / Max              | Avg           | Min / Max              | Avg           |
| Baseline | 86.84% / 87.15%        | 87.03%        | 76.47% / 77.35%        | 76.95%        | 87.79% / 88.52%        | 88.10%        |
| ANODEV2  | <b>88.59% / 88.96%</b> | <b>88.78%</b> | <b>77.27% / 78.58%</b> | <b>78.11%</b> | <b>88.67% / 89.39%</b> | <b>89.04%</b> |
| Imp.     | 1.75% / 1.81%          | 1.75%         | 0.80% / 1.23%          | 1.16%         | 0.88% / 0.87%          | 0.94%         |

The dynamics of how the NN parameters are evolved in time is illustrated in Figure 1, where we extract the first  $5 \times 5$  convolution of AlexNet and show how it evolves in time. Here,  $Time$  represents how long  $\theta$  evolves in time, i.e.,  $Time = 0$  shows the result of  $\theta(t = 0)$  and  $Time = 1$  shows the result of  $\theta(t = 1)$ . It can be clearly seen that the coupled ODE based method encapsulates more complex dynamics of  $\theta$  in time. Similar illustrations for ResNet-4 and ResNet-10 are shown in Figure 4 and 5 in the appendix.

### 3.2 Configuration Two

Here, we test the second configuration where the evolution of the parameters and the activations could have different time steps. This means the parameter is only applied after a certain number of time steps of evolution but not at every time step which was the case in the first configuration. This effectively reduces the depth of the network and the computational cost, and allows sufficient time for the neurons to be evolved, instead of naively applying them at each time step. An illustration for this configuration is shown in Figure 2 (bottom). The results on AlexNet, ResNet4 and ResNet10 are shown in Table 2, where we again report the min/max and average accuracy over five runs. As in the previous setting (configuration 1), the coupled ODE based network performs better in all cases. The minimum performance of the coupled ODE based network still is comparable or even better than the maximum performance of the baseline. Although the overall performance of this setting is slightly worse than the previous configuration, the computational cost is much less, due to the smaller effective depth of the network that the activations go through.

**Table 2:** Results for using  $Nt = 2$  time steps to solve  $z$  in neural network and  $Nt = 10$  to solve  $\theta$  in the ODE block (configuration 2). ANODEV2 achieves 1.23%, 0.78% and 0.83% improvement over the baseline respectively. Note that the model size is comparable to baseline Table 1.

|          | AlexNet               |               | ResNet-4               |               | ResNet-10              |               |
|----------|-----------------------|---------------|------------------------|---------------|------------------------|---------------|
|          | Min / Max             | Avg           | Min / Max              | Avg           | Min / Max              | Avg           |
| Baseline | 86.84% / 87.15%       | 87.03%        | 76.47% / 77.35%        | 76.95%        | 87.79% / 88.52%        | 88.10%        |
| ANODEV2  | <b>88.1% / 88.33%</b> | <b>88.26%</b> | <b>77.23% / 78.28%</b> | <b>77.73%</b> | <b>88.65% / 89.19%</b> | <b>88.93%</b> |
| Imp.     | 1.26% / 1.18%         | 1.23%         | 0.76% / 0.93%          | 0.78%         | 0.86% / 0.67%          | 0.83%         |

## 4 Ablation Study

Here we perform an ablation study in which we remove the evolution of the model parameters, and instead fix them to stale values in time (which is the configuration used in [8, 9]), and test with a case where the model parameters are indeed evolved in time which corresponds to results of Table 2. Precisely we use two time steps for activation ODE (Eq. 5b) and ten time steps for the evolution of

the model parameters (Eq. 5c). In this setting both the FLOPS and model sizes are the same, allowing us to test the efficacy of evolving model parameters. The results are shown in Table 4. As one can

**Table 3:** Parameter comparison for two ANODEV2 configurations, the network used in section 4, and the baseline network. The parameter size of ANODEV2 is comparable with others.

|                   | AlexNet  | ResNet-4 | ResNet-10 |
|-------------------|----------|----------|-----------|
| Baseline          | 1756.68K | 7.71K    | 44.19K    |
| ANODEV2 config. 1 | 1757.51K | 8.23K    | 45.77K    |
| ANODEV2 config. 2 | 1757.13K | 7.99K    | 45.05K    |
| Neural ODE [8, 9] | 1757.13K | 7.96K    | 44.95K    |

see, there is indeed benefit in allowing the model parameter to evolve in time, which is rather obvious since it gives more flexibility to the neural network to evolve the model parameters. To allow for a fair comparison, the Neural ODE results are derived using the DTO approach with checkpointing presented in [9]. Had we used the approach used in [8], the results would have been significantly worse for the Neural ODE approach as shown in [9]. Also note that evolving model parameters has a negligible computational cost, since we can actually use analytical solutions for solving the reaction-diffusion-advection which is discussed in Appendix A.1.

**Table 4:** Results for the ablation study of ANODEV2.

|                   | AlexNet               |               | ResNet-4               |               | ResNet-10              |               |
|-------------------|-----------------------|---------------|------------------------|---------------|------------------------|---------------|
|                   | Min / Max             | Avg           | Min / Max              | Avg           | Min / Max              | Avg           |
| Baseline          | 86.84% / 87.15%       | 87.03%        | 76.47% / 77.35%        | 76.95%        | 87.79% / 88.52%        | 88.10%        |
| Neural ODE [8, 9] | 87.86% / 88.14%       | 88.02%        | 76.92% / 77.45%        | 77.30%        | 88.48% / 88.75%        | 88.60%        |
| ANODEV2           | <b>88.1% / 88.33%</b> | <b>88.26%</b> | <b>77.23% / 78.28%</b> | <b>77.73%</b> | <b>88.65% / 89.19%</b> | <b>88.93%</b> |

#### 4.1 Parameter Size Comparison

In this section, we provide the parameter sizes of the two configurations tested above and the model used in ablation study in section 4. It can be clearly seen that the model sizes of both configurations are roughly the same as those of the baseline models. In fact, configuration 1 grows the parameter sizes of AlexNet, ResNet-4, and ResNet-10 by only 0.5% to 6.7% as compared to those of baseline models. In the second configuration, the parameter size increases from 0.2% to 3.6% compared to baseline model (note that we even count the additional batch norm parameters for fair comparison). Comparing with the ablation network used in section 4, in which we apply the same model parameters for multiple time steps, ANODEV2 configuration 2 has basically the same number of parameters. Table 3 summarizes all the results.

## 5 Conclusions

The connection between residual networks and ODEs has been recently found in several works. Here, we propose ANODEV2, which is a more general extension of this approach by introducing a coupled ODE based framework, motivated by the works in neural evolution. The framework allows dynamical evolution of both the residual parameters as well as the activations in a coupled formulation. This gives more flexibility to the neural network to adjust the parameters to achieve better generalization performance. We derived the optimality conditions for this coupled formulation and presented preliminary experiments using two different configurations, and showed that we can indeed train such models using our differential framework. The results on three Neural Networks (AlexNet, ResNet-4, and ResNet-10) all showed accuracy gains across five different trials. In fact the worst accuracy of the coupled ODE formulation was better than the best performance of the baseline. This is achieved with negligible change in the model parameter size. To the best of our knowledge, this is the first coupled ODE formulation that allows for the evolution of the model parameters in time along with the activations. We are working on extending the framework for other learning tasks. The source code will be released as open source software to the public.



## References

- [1] K. He, X. Zhang, S. Ren, and J. Sun, “Deep residual learning for image recognition,” in *Proceedings of the IEEE conference on computer vision and pattern recognition*, pp. 770–778, 2016.
- [2] K. He, X. Zhang, S. Ren, and J. Sun, “Identity mappings in deep residual networks,” in *European conference on computer vision*, pp. 630–645, Springer, 2016.
- [3] E. Weinan, “A proposal on machine learning via dynamical systems,” *Communications in Mathematics and Statistics*, vol. 5, no. 1, pp. 1–11, 2017.
- [4] E. Haber and L. Ruthotto, “Stable architectures for deep neural networks,” *Inverse Problems*, vol. 34, no. 1, p. 014004, 2017.
- [5] L. Ruthotto and E. Haber, “Deep neural networks motivated by partial differential equations,” *arXiv preprint arXiv:1804.04272*, 2018.
- [6] Y. Lu, A. Zhong, Q. Li, and B. Dong, “Beyond finite layer neural networks: Bridging deep architectures and numerical differential equations,” *arXiv preprint arXiv:1710.10121*, 2017.
- [7] M. Ciccone, M. Gallieri, J. Masci, C. Osendorfer, and F. Gomez, “Nais-net: Stable deep networks from non-autonomous differential equations,” *arXiv preprint arXiv:1804.07209*, 2018.
- [8] T. Q. Chen, Y. Rubanova, J. Bettencourt, and D. K. Duvenaud, “Neural ordinary differential equations,” in *Advances in Neural Information Processing Systems*, pp. 6571–6583, 2018.
- [9] A. Gholami, K. Keutzer, and G. Biros, “Anode: Unconditionally accurate memory-efficient gradients for neural odes,” *arXiv preprint arXiv:1902.10298*, 2019.
- [10] “Anonymized for review,” Nov. 2019.
- [11] A. Lindenmayer, “Mathematical models for cellular interactions in development i. filaments with one-sided inputs,” *Journal of theoretical biology*, vol. 18, no. 3, pp. 280–299, 1968.
- [12] A. M. Turing, “The chemical basis of morphogenesis,” *Bulletin of mathematical biology*, vol. 52, no. 1-2, pp. 153–197, 1990.
- [13] R. K. Belew and T. E. Kammeyer, “Evolving aesthetic sorting networks using developmental grammars,” in *ICGA*, p. 629, Citeseer, 1993.
- [14] P. Bentley and S. Kumar, “Three ways to grow designs: A comparison of embryogenies for an evolutionary design problem,” in *Proceedings of the 1st Annual Conference on Genetic and Evolutionary Computation-Volume 1*, pp. 35–43, Morgan Kaufmann Publishers Inc., 1999.
- [15] F. Dellaert and R. D. Beer, “A developmental model for the evolution of complete autonomous agents,” in *Proceedings of the fourth international conference on simulation of adaptive behavior*, pp. 393–401, MIT Press Cambridge, MA, 1996.
- [16] P. Eggenberger, “Evolving morphologies of simulated 3d organisms based on differential gene expression,” in *Proceedings of the fourth european conference on Artificial Life*, pp. 205–213, 1997.
- [17] G. S. Hornby and J. B. Pollack, “Creating high-level components with a generative representation for body-brain evolution,” *Artificial life*, vol. 8, no. 3, pp. 223–246, 2002.
- [18] K. O. Stanley, D. B. D’Ambrosio, and J. Gauci, “A hypercube-based encoding for evolving large-scale neural networks,” *Artificial life*, vol. 15, no. 2, pp. 185–212, 2009.
- [19] K. O. Stanley, “Exploiting regularity without development,” in *Proceedings of the AAAI Fall Symposium on Developmental Systems*, p. 37, AAAI Press Menlo Park, CA, 2006.
- [20] K. O. Stanley, “Compositional pattern producing networks: A novel abstraction of development,” *Genetic programming and evolvable machines*, vol. 8, no. 2, pp. 131–162, 2007.
- [21] J. Koutnik, F. Gomez, and J. Schmidhuber, “Evolving neural networks in compressed weight space,” in *Proceedings of the 12th annual conference on Genetic and evolutionary computation*, pp. 619–626, ACM, 2010.
- [22] C. Fernando, D. Banarse, M. Reynolds, F. Besse, D. Pfau, M. Jaderberg, M. Lanctot, and D. Wierstra, “Convolution by evolution: Differentiable pattern producing networks,” in *Proceedings of the Genetic and Evolutionary Computation Conference 2016*, pp. 109–116, ACM, 2016.
- [23] J. Schmidhuber, “Learning to control fast-weight memories: An alternative to dynamic recurrent networks,” *Neural Computation*, vol. 4, no. 1, pp. 131–139, 1992.

- 335 [24] J. Schmidhuber, “A ‘self-referential’ weight matrix,” in *International Conference on Artificial*  
336 *Neural Networks*, pp. 446–450, Springer, 1993.
- 337 [25] D. Ha, A. Dai, and Q. V. Le, “Hypernetworks,” *arXiv preprint arXiv:1609.09106*, 2016.
- 338 [26] L. Younes, “Shapes and diffeomorphisms,” *Springer Science & Business Media*.

## 339 A RDA Simulation

340 In this section, we provide the details for the reaction-diffusion-advection solver and an exemplary  
 341 simulation shown in Figure 3. For illustration of the idea, we set the initial distribution of  $\theta$  to be  
 342 a unit Gaussian centered in the middle. In the first row, we show how this single modal Gaussian  
 343 changes in time when only diffusion operator is used in the control operator. As shown in the figure,  
 344 the diffusion operator allows the parameters to evolve from a Gaussian with unit variance, to Gaussian  
 345 filters with higher variance. A similar illustration is shown in the second row with advection operator.  
 346 Notice how the advection operator allows modeling of different filters centered at different locations  
 347 with the same variance (since advection operator does not diffuse filters but transports them). The  
 348 third row shows the simulation when we only use an exponential growth operator for the reaction  
 349 part. Notice how this operator could allow the kernel to increase/decrease its intensities at different  
 350 pixels in time. Finally in the last row, we show an example where we use all three operators together.

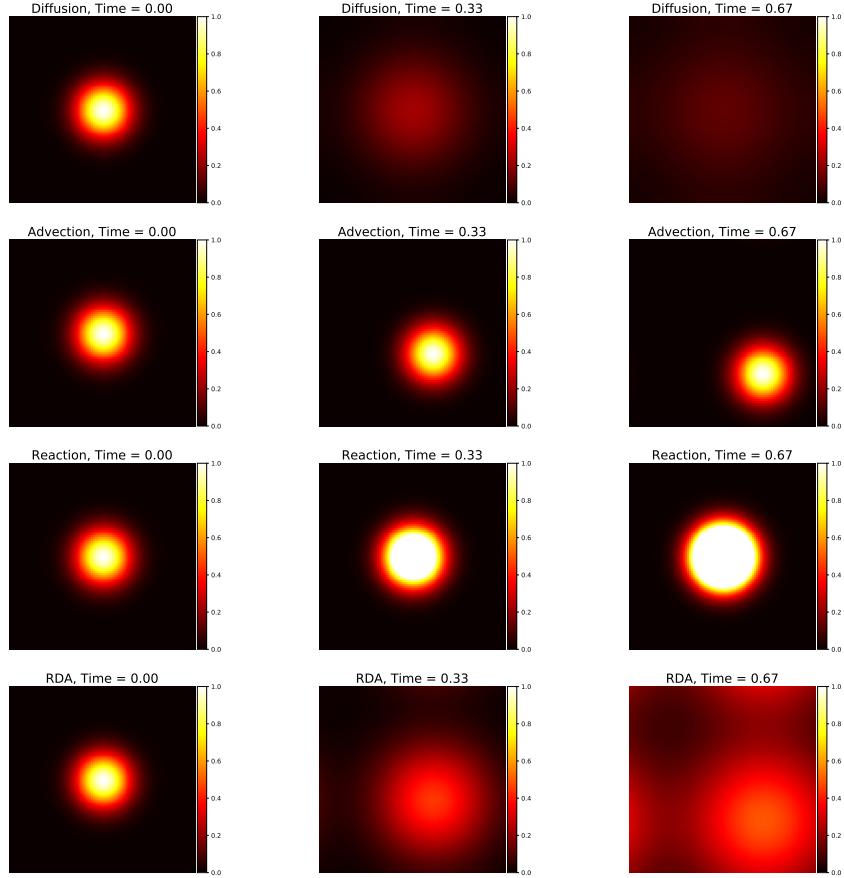

**Figure 3:** Illustration of how different convolution maps could be encoded through the parameter PDE solver. Here we show an exemplary convolution at time  $t = 0$  (left image), as well as its evolution through time, when we apply the reaction-diffusion-advection (RDA) PDE for the model parameters. Note that with this PDE based encoding, we only need to store the initial condition for the parameters (i.e.,  $t = 0$ ). The rest of the model parameters could be computed using this initial condition.

### 351 A.1 Numerical Method

352 We set  $K$  to be a Dirac delta function, and use the above reaction-diffusion-advection function for  
 353  $q(w, p)$ . We have

$$\begin{cases} \frac{dz}{dt} = f(z; \theta), \\ \frac{dw}{dt} = \sigma(\tau \Delta w + v \cdot \nabla w + \rho w). \end{cases} \quad (10)$$

Here, we discuss how can we solve the ODE system Eq. 10. For the evolution of  $z$ , we follow [9] and use forward Euler method to solve  $z$ . For example, if we set time step,  $N_t$  to be 2, then

$$z_{1/2} = z_0 + \frac{1}{2}f(z_0; \theta_0); \quad z_1 = z_{1/2} + \frac{1}{2}f(z_{1/2}; \theta_{1/2}).$$

It is not hard to see that if  $N_t = 1$ , then the output is the same as the original ResNet. For the evolution of  $\theta$  without non-linearity, i.e.  $\sigma$  is the identical map, there exists an analytic solution can in the frequency domain. Applying Fast Fourier Transform (FFT) from Eq. 8 we will get:

$$F(w)_t = F(\tau\Delta w + v \cdot \nabla w + \rho w), \quad (11)$$

where  $F(\cdot)$  denotes FFT operator. Since the diffusion, advection, and reaction coefficients are constant, we can find the analytical solution in the frequency domain. That is:

$$w_{t_0+\delta t} = F^{-1}(\exp(-\delta t\tau k^2 + ik\delta t v + \delta t\rho)F(w_{t_0})), \quad (12)$$

where  $F^{-1}$  is inverse FFT. Note that due to the existence of this analytical solution the computational cost of solving the evolution for  $\theta$  becomes negligible which is an important benefit of this approach. When non-linearity is applied, we use an approximation to solve Eq. 8,

$$w_{t_0+\delta t} = \sigma(F^{-1}(\exp(-\delta t\tau k^2 + ik\delta t v + \delta t\rho)F(w_{t_0}))). \quad (13)$$

This means we first apply FFT and its inverse to solve the linear system then apply the non-linear function  $\sigma$ . Here,  $\delta t$  means the time scale to compute  $\theta$ . Also, in this paper we set the non-linearity function  $\sigma$  to be tanh. However, other non-linearities could also be used. For configuration 1, we use  $N_t = 5$ . And for configuration 2, we use  $N_t = 2$  to solve  $z$  and  $N_t = 10$  to solve  $\theta$ . In this configuration, the FLOPS will be only  $2\times$  of the original baseline network. Upon this condition, the process can be formulated as,

$$z_{1/2} = z_0 + \frac{1}{2}f(z_0; \theta_0); \quad z_1 = z_{1/2} + \frac{1}{2}f(z_{1/2}; \theta_1);$$

where  $\theta_1$  is generated with  $\delta t = 1/10$ .

## B Model Configuration

In this section, we provide the architecture we used for the tests in section 3. The AlexNet, ResNet-4 and ResNet-10 we are using are described in following sections.

### B.1 AlexNet

We used a 2-layer convolution with residual connection added to the second convolution. Thus, we can transform the second convolution into an ODE. Table 5 explains detailed structure layer by layer. For simplicity, we omit the batch normalization and ReLU layer added after each convolution.

**Training details.** We train AlexNet for 120 epochs with initial learning rate 0.1. The learning rate decays by a factor of 10 at epoch 40, 80 and 100. Data augmentation is implemented. Also, the batch size used for training is 256. Note that the setting is the same for all experiments, i.e. baseline, Neural ODE, and ANODEV2.

### B.2 ResNet-4 and ResNet-10

Here, we provide the architecture of ResNet-4 and ResNet-10 used section 3. We also omit the batch normalization and ReLU for simplicity. Detailed structure are provided in Table 6.

**Training details.** We train ResNet-4/10 for 350 epochs with initial learning rate 0.1. The learning rate decays by a factor of 10 at epoch 150, and 300. Data augmentation is implemented. Also, the batch size used for training is 256. Note that the setting is the same for all experiments, i.e. baseline, Neural ODE, and ANODEV2.

## C Convolution kernel Evolution Example

In this section, we show some examples of how the model parameters  $\theta$  are evolved in time. Results for ResNet-4 and ResNet-10 are shown in Figure 4 and Figure 5 respectively.

**Table 5:** Summary of the architecture used in AlexNet. This is a 2-convolution network with residual connection added to the second convolution, followed by three fully connected layer.

| Name     | output size | Channel In / Out | Kernel Size | Residual |
|----------|-------------|------------------|-------------|----------|
| conv1    | 32×32       | 3 / 64           | 5×5         | No       |
| max pool | 16×16       | 64 / 64          | -           | -        |
| conv2    | 16×16       | 64 / 64          | 5×5         | Yes      |
| max pool | 8×8         | 64 / 64          | -           | -        |
| Name     | input size  | output size      |             |          |
| fc1      | 4096        | 384              |             |          |
| fc2      | 384         | 192              |             |          |
| fc3      | 192         | 10               |             |          |

**Table 6:** Summary of the architecture used in ResNet-4 and ResNet-10. ResNet-10 is a ResNet family that has 2 layers with 2 residual blocks in each layer. ResNet-4 has only 1 layer with only 1 residual block inside.

| Name     | output size                     | Channel In / Out | Kernel Size                                              | Residual | Blocks(ResNet-4 / ResNet-10) |
|----------|---------------------------------|------------------|----------------------------------------------------------|----------|------------------------------|
| conv1    | 32×32                           | 3 / 16           | 3×3                                                      | No       | 1 / 1                        |
| layer1_1 | 32×32                           | 16 / 16          | $\begin{bmatrix} 3 \times 3 \\ 3 \times 3 \end{bmatrix}$ | Yes      | 1 / 1                        |
| layer1_2 | 32×32                           | 16 / 16          | $\begin{bmatrix} 3 \times 3 \\ 3 \times 3 \end{bmatrix}$ | Yes      | 0 / 1                        |
| layer2_1 | 16×16                           | 16 / 32          | $\begin{bmatrix} 3 \times 3 \\ 3 \times 3 \end{bmatrix}$ | Yes      | 0 / 1                        |
| layer2_2 | 16×16                           | 32 / 32          | $\begin{bmatrix} 3 \times 3 \\ 3 \times 3 \end{bmatrix}$ | Yes      | 0 / 1                        |
| Name     | Kernel Size                     | Stride           | Output Size (ResNet-4/ResNet-10)                         |          |                              |
| max pool | 8×8                             | 8                | 4×4 / 2×2                                                |          |                              |
| Name     | input size (ResNet-4/ResNet-10) | output size      |                                                          |          |                              |
| fc       | 256 / 128                       | 10               |                                                          |          |                              |

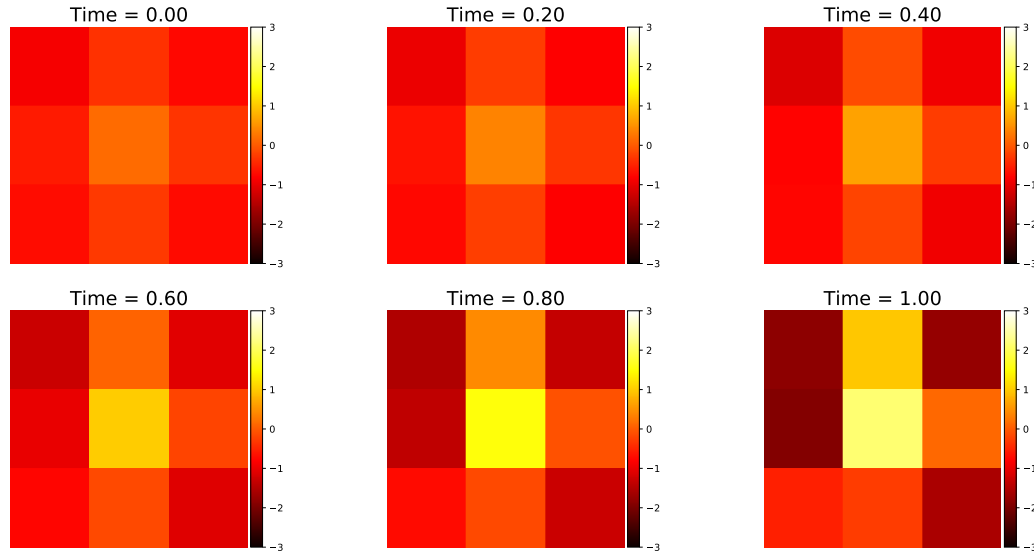

**Figure 4:** Illustration of how different convolution operators are evolved in time during the neural ODE solve. This is one channel of the first convolution in first layer in ResNet-4. Similar pattern can be observed as Figure 1.

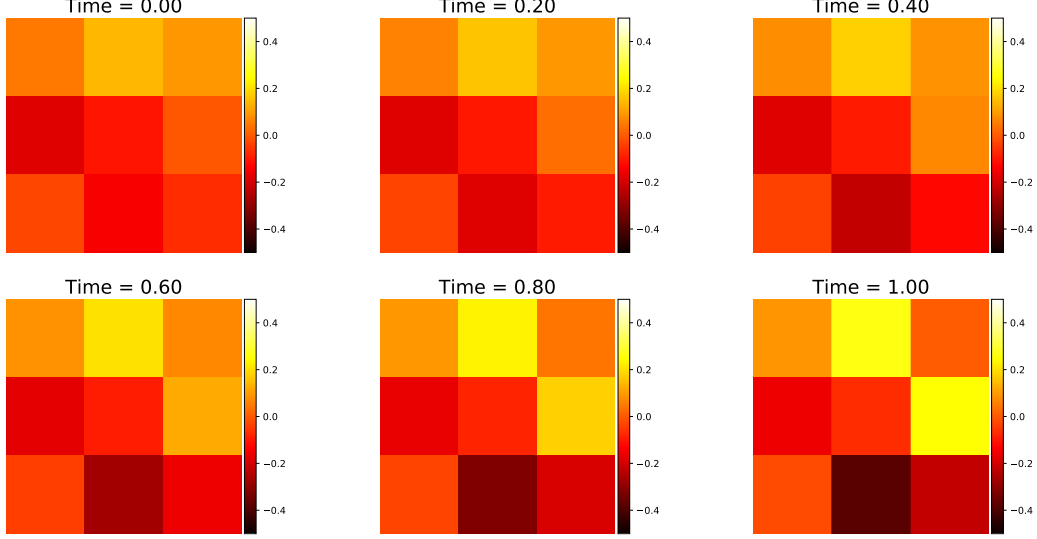

**Figure 5:** Illustration of how different convolution operators are evolved in time during the neural ODE solve. This is one channel of the first convolution in first layer in ResNet-10. Similar pattern can be observed as Figure 1.

## 392 D Derivation of Optimality Conditions

393 Here we present detailed derivation of the optimality conditions corresponding to Eq. 5. We need  
 394 to find the so called KKT conditions, which can be found by finding stationary points of the  
 395 corresponding Lagrangian, defined as:

$$\begin{aligned} \mathcal{L} = & \mathcal{J}(z_1) + \int_0^1 \alpha(t) \cdot \left( \frac{dz}{dt} - f(z(t), \theta(t)) \right) dt + \int_0^1 \beta(t) \cdot \left( \frac{\partial w}{\partial t} - q(w, p) \right) dt \\ & + \int_0^1 \gamma(t) \cdot \left( \theta(t) - \int_0^t K(t - \tau) w(\tau) d\tau \right) dt + \alpha_0 \cdot (z_0 - z(0)) + \beta_0 \cdot (w_0 - w(0)). \end{aligned} \quad (14)$$

396 In order to derive the optimality conditions, we first take variations with respect to  $\alpha(t)$ ,  $\beta(t)$ , and  
 397  $\gamma(t)$ . This basically results in the “Activation ODE”, the “Evolution ODE”, and the relation between  
 398  $\theta(t)$  and  $w(t)$ , shown in Eq. 5. Taking variations with respect to  $z(t)$  will result in a backward-in-time  
 399 ODE for the  $\alpha(t)$ , which is continuous equivalent to backpropagation. Taking variations with respect  
 400 to  $\theta$  will result in an algebraic relation between  $\alpha(t)$  and  $\gamma(t)$ ; taking variations with respect to  
 401  $w(t)$  will be split in two parts. Variations with respect to  $w(t)$  for  $t > 0$ ; and with respect to  $w(0)$   
 402 which is in fact one of our unknown parameters. The split is done by first integrating by parts the  
 403  $\int_0^1 \beta(t) dw(t)/dt$  term to expose a term that reads  $\beta(1)w(1) - \beta(0)w_0$ , and then taking variations  
 404 with respect to  $w_0$ . Finally, we also need to take variations with respect to the vector  $p$ . One small  
 405 technical detail is that to take the variations of the  $\int_0^1 \gamma(t) \cdot \int_0^t K(t - \tau) w(\tau) d\tau dt$  with respect to  $w$   
 406 can be done easily by converting it  $\int_0^1 \gamma(t) \cdot \int_0^1 (1 - H(t)) K(t - \tau) w(\tau) d\tau dt$ . The details are given  
 407 below.

408 In order to satisfy the first optimality condition on  $z$  we have:

$$\left( \frac{\partial \mathcal{L}}{\partial z} \right)^T \hat{z} = 0,$$



409 where this equality must hold for any variation  $\hat{z}$  in space and time. We have:

$$\begin{aligned} \left(\frac{\partial \mathcal{L}}{\partial z}\right)^T \hat{z} &= \left(\frac{\partial \mathcal{J}(z_1)}{\partial z_1}\right)^T \hat{z}_1 + \int_0^1 \left(-\frac{\partial \alpha}{\partial t} - \frac{\partial f(z, \theta)^T}{\partial z} \alpha\right)^T \hat{z} dt + (\alpha_1^T \hat{z}_1 - \alpha_0^T \hat{z}_0) + \alpha_0^T \hat{z}_0 \\ &= \left(\frac{\partial \mathcal{J}(z_1)}{\partial z_1}\right)^T \hat{z}_1 + \alpha_1^T \hat{z}_1 + \int_0^1 \left(-\frac{\partial \alpha}{\partial t} - \frac{\partial f(z, \theta)^T}{\partial z} \alpha\right)^T \hat{z} dt = 0. \end{aligned} \quad (15)$$

410 Imposing this condition holds for all variation  $\hat{z}$  will result in the first adjoint equation as follows:

$$\frac{\partial \mathcal{J}(z(1))}{\partial z_1} + \alpha_1 = 0, \quad -\frac{\partial \alpha}{\partial t} - \left(\frac{\partial f}{\partial z}\right)^T \alpha = 0. \quad (16)$$

411 For  $\theta$ , the following equation needs to be satisfied:

$$\left(\frac{\partial \mathcal{L}}{\partial \theta}\right)^T \hat{\theta} = 0.$$

412 We have

$$\left(\frac{\partial \mathcal{L}}{\partial \theta}\right)^T \hat{\theta} = \int_0^1 \left(-\frac{\partial f(z, \theta)}{\partial \theta}\right)^T \alpha^T \hat{\theta} dt + \int_0^1 \gamma^T \hat{\theta} dt. \quad (17)$$

413 This further implies:

$$-\left(\frac{\partial f(z, \theta)}{\partial \theta}\right)^T \alpha + \gamma = 0. \quad (18)$$

414 Finally, the inversion equation on  $w$  could be found by performing variation on  $w$ :

$$\left(\frac{\partial \mathcal{L}}{\partial w}\right)^T \hat{w} = 0.$$

415 We have

$$\begin{aligned} \left(\frac{\partial \mathcal{L}}{\partial w}\right)^T \hat{w} &= \int_0^1 -\left(\frac{\partial \beta}{\partial t} - \frac{\partial q(w; p)}{\partial w} \beta\right)^T \hat{w} dt \\ &\quad + \beta_1^T \hat{w}_1 + \int_0^1 (1 - H(t)) \int_0^t -(K^T(t - \tau) \gamma)^T d\tau \hat{w} dt \\ &= \int_0^1 -\left(\frac{\partial \beta}{\partial t} - \frac{\partial q(w; p)}{\partial w} \beta\right)^T \hat{w} dt \\ &\quad + \beta_1^T \hat{w}_1 + \int_0^1 (1 - H(t)) \int_0^t -(K^T(t - \tau) \gamma)^T d\tau \hat{w} dt, \end{aligned} \quad (19)$$

416 where  $H(t)$  is the scalar Heaviside function. Imposing this condition holds for all variation  $\hat{w}$  will  
417 result in the inversion equation as follows,

$$-\frac{\partial \beta}{\partial t} - \left(\frac{\partial q(w; p)}{\partial w}\right)^T \beta + (1 - H(t)) \int_0^t -K^T(t - \tau) \gamma d\tau, \quad \beta_1 = 0. \quad (20)$$

418 The gradient of  $\mathcal{L}$  with respect to  $w_0$  can be computed as,

$$g_{w_0} = \frac{\partial \mathcal{L}}{\partial w_0} = \frac{\partial R(w_0, p)}{\partial w_0} - \beta_0. \quad (21)$$

419 Finally, the gradient of  $\mathcal{L}$  with respect to  $p$  can be computed as,

$$g_p = \frac{\partial \mathcal{L}}{\partial p} = \frac{\partial R(w_0, p)}{\partial p} - \int_0^1 \left(\frac{\partial q(w, p)}{\partial p}\right)^T \beta(t) dt. \quad (22)$$

420 Note that if optimality conditions are achieved with respect to  $w_0$  and  $p$ , then

$$g_{w_0} = 0, \quad g_p = 0. \quad (23)$$
